# Supplementary material for: Sequential crystallization of high and low melting waxes to improve oil structuring in wax-based oleogels
Source: Royal Society of Chemistry journal article supplement (doi:10.1039/c6ra27650d), 2017-01-01
Supplement: c6ra27650d1.pdf [file c6ra27650d1.pdf]

## Electronic Supplementary Information (ESI)

### Sequential crystallization of high and low melting waxes to improve oil structuring in wax-based oleogels

Authors: Iris Tavernier, Chi Diem Doan, Davy Van de Walle, Sabine Danthine, Tom Rimaux, Koen Dewettinck

Manuscript RSC Advances: RA-ART-12-2016-027650.R1

*Table S1: Overview of peak melting temperatures and peak crystallization temperatures of wax-based oleogels gelled with one type of wax (5% w/w, 4% w/w, 2.5% w/w and 1% w/w) and of wax-based oleogels gelled with a combination of two waxes in a ratio of 4:1, 2.5:2.5 and 1:4*

| Sample              | T <sub>m, peak</sub> (high) | T <sub>m, peak</sub> (low) | T <sub>c, peak</sub> (high) | T <sub>c, peak</sub> (low) |
|---------------------|-----------------------------|----------------------------|-----------------------------|----------------------------|
| 5% RBW              | 68.12 ± 0.06                |                            | 53.71 ± 0.46                |                            |
| 4% RBW              | 67.20 ± 0.25                |                            | 51.02 ± 1.01                |                            |
| 2.5% RBW            | 66.19 ± 0.32                |                            | 48.54 ± 0.06                |                            |
| 1% RBW              | 61.25 ± 0.44                |                            | 39.49 ± 0.57                |                            |
| 5% SW               | 63.76 ± 0.23                |                            | 60.24 ± 0.78                |                            |
| 4% SW               | 62.36 ± 0.09                |                            | 58.53 ± 0.53                |                            |
| 2.5% SW             | 60.00 ± 0.15                |                            | 54.91 ± 0.86                |                            |
| 1% SW               | 55.95 ± 0.30                |                            | 47.53 ± 0.32                |                            |
| 5% BEW              |                             | 20.50 ± 1.15               |                             | 11.22 ± 1.31               |
| 4% BEW              |                             | 17.82 ± 0.12               |                             | 7.39 ± 0.23                |
| 2.5% BEW            |                             | 15.11 ± 0.14               |                             | 2.74 ± 0.17                |
| 1% BEW              |                             | 12.09 ± 0.23               |                             | n.d.                       |
| 4% RBW – 1% SW      | 67.26 ± 0.20                |                            | 54.07 ± 0.22                |                            |
| 2.5% RBW – 2.5% SW  | 65.79 ± 0.17                |                            | 54.87 ± 0.05                |                            |
| 1% RBW – 4% SW      | 64.94 ± 0.24                |                            | 57.08 ± 0.09                |                            |
| 4% SW – 1% BEW      | 62.33 ± 0.08                | 11.34 ± 0.23               | 58.77 ± 0.05                | n.d.                       |
| 2.5% SW – 2.5% BEW  | 58.85 ± 1.09                | 15.23 ± 0.21               | 54.59 ± 0.92                | 2.85 ± 0.30                |
| 1% SW – 4% BEW      | 55.64 ± 0.30                | 17.52 ± 0.21               | 47.36 ± 1.29                | 6.22 ± 0.02                |
| 4% RBW – 1% BEW     | 67.71 ± 0.55                | 12.20 ± 0.47               | 50.30 ± 1.89                | n.d.                       |
| 2.5% RBW – 2.5% BEW | 66.31 ± 0.52                | 14.17 ± 0.22               | 48.65 ± 0.81                | 2.67 ± 0.11                |
| 1% RBW – 4% BEW     | 60.89 ± 0.69                | 17.09 ± 0.42               | 39.65 ± 1.59                | 7.40 ± 0.68                |

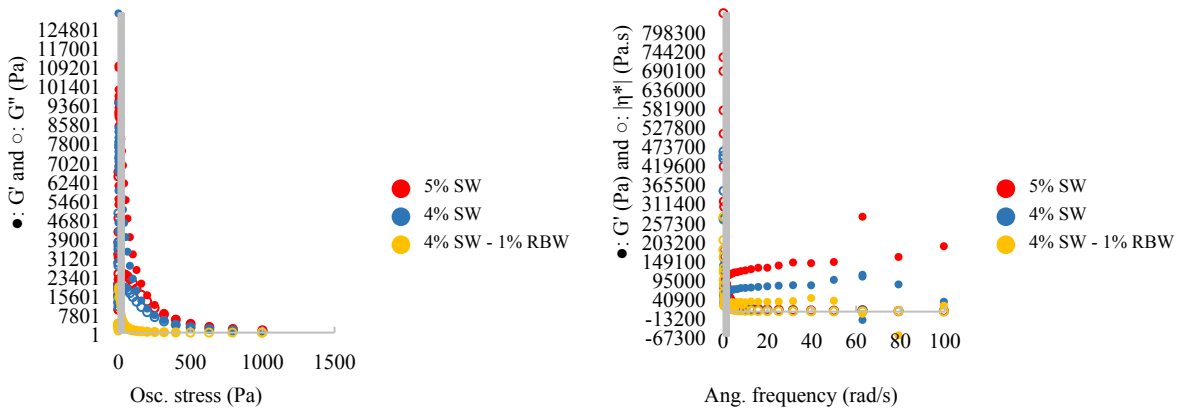

Figure S1: Amplitude sweeps (left) and frequency sweeps (right) of oleogels prepared with 5% SW, 4% SW and 4%SW:1%RBW

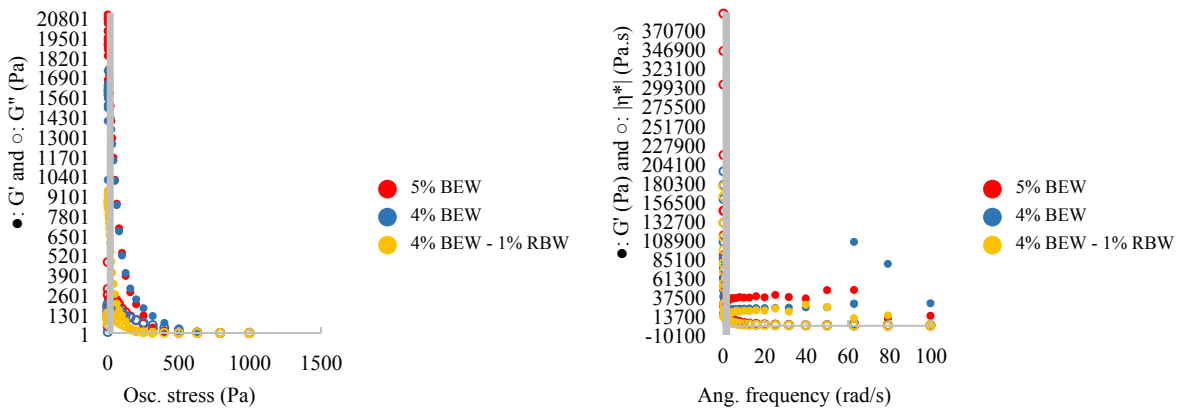

Figure S2: Amplitude sweeps (left) and frequency sweeps (right) of oleogels prepared with 5% BEW, 4% BEW and 4%BEW:1%RBW

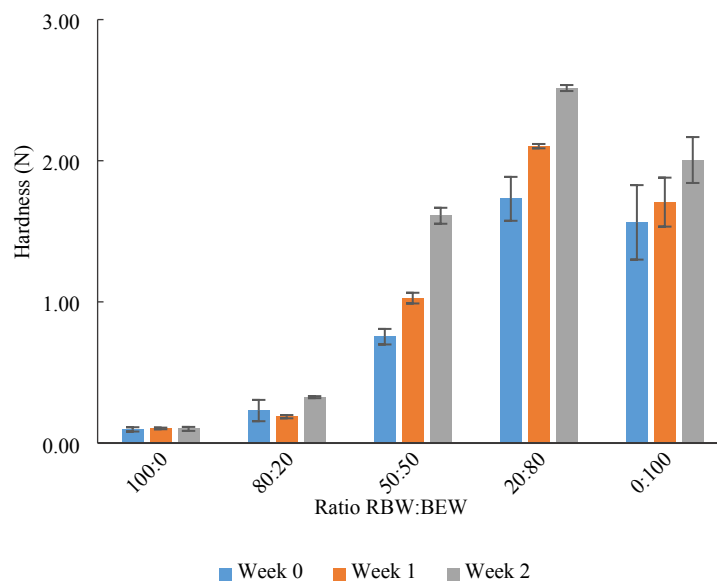

Figure S3: Evolution of hardness of 5% w/w RBW:BEW oleogel during 2 weeks

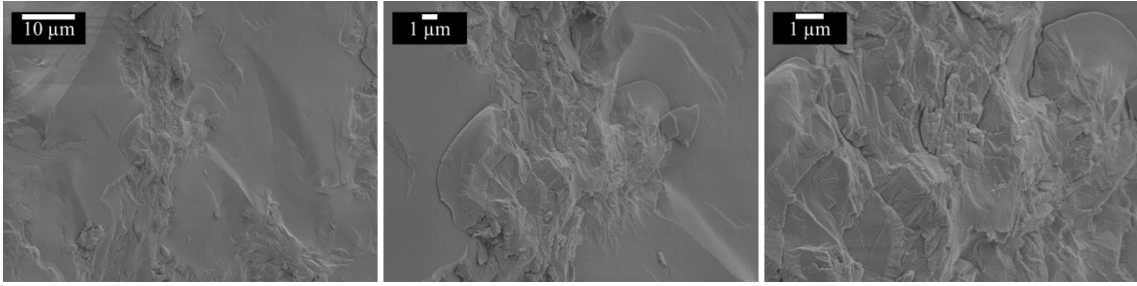

Figure S4: Cryo-SEM image of 5% RBW-oleogel at different magnifications
